# Supplementary material for: Tight clustering for large datasets with an application to gene expression data
Source: PubMed Central journal article supplement (PMC6395712; doi:10.1038/s41598-019-39459-w), 2019-02-28
Supplement: 41598_2019_39459_MOESM1_ESM.pdf [file 41598_2019_39459_MOESM1_ESM.pdf]

# Supplement : Tight clustering for large datasets with an application to gene expression data

Bikram Karmakar<sup>1</sup>, Sarmistha Das<sup>2</sup>, Sohom Bhattacharya<sup>2</sup>,  
Rohan Sarkar<sup>2</sup>, and Indranil Mukhopadhyay<sup>2,\*</sup>

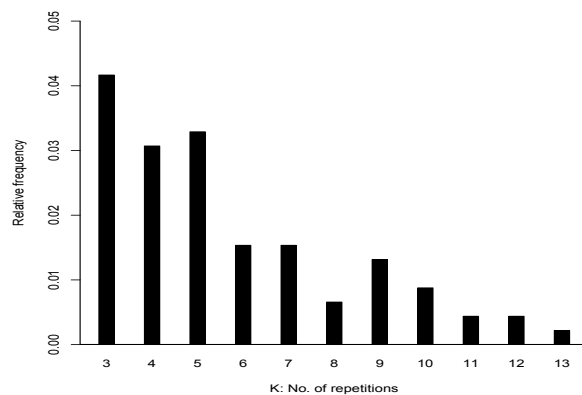

Figure S1: Frequency distribution of maximum two Rand Indices over repetitions.

---

<sup>1</sup> Department of Statistics, University of Pennsylvania, Philadelphia, U.S.A.

<sup>2</sup>Human Genetics Unit, Indian Statistical Institute, Kolkata, India

\* email : indranil@isical.ac.in

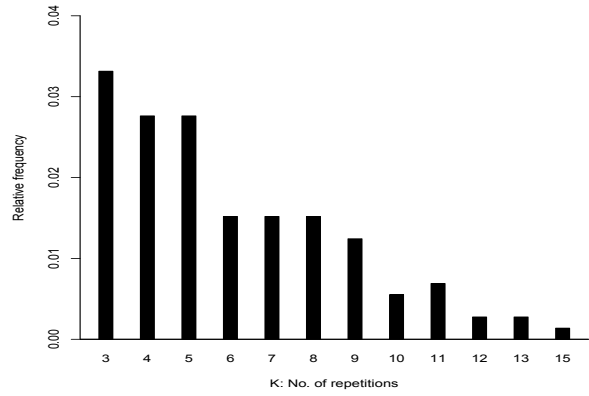

Figure S2: Frequency distribution of maximum three Rand Indices over repetitions.

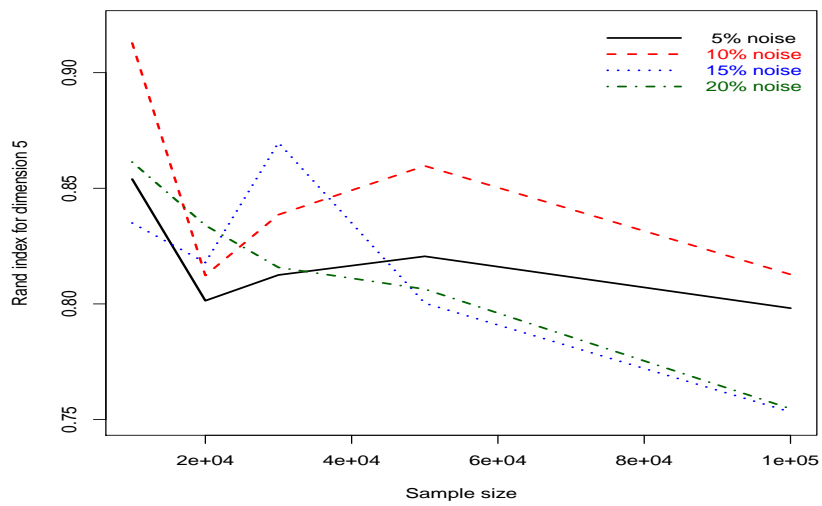

Figure S3: Rand Index plot for different sample sizes varied over noise levels for fixed dimension 5.

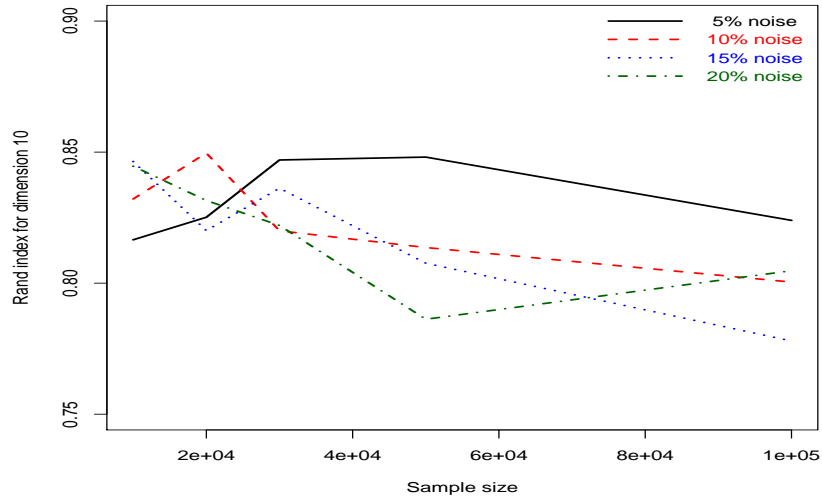

Figure S4: Rand Index plot for different sample sizes varied over noise levels for fixed dimension 10.

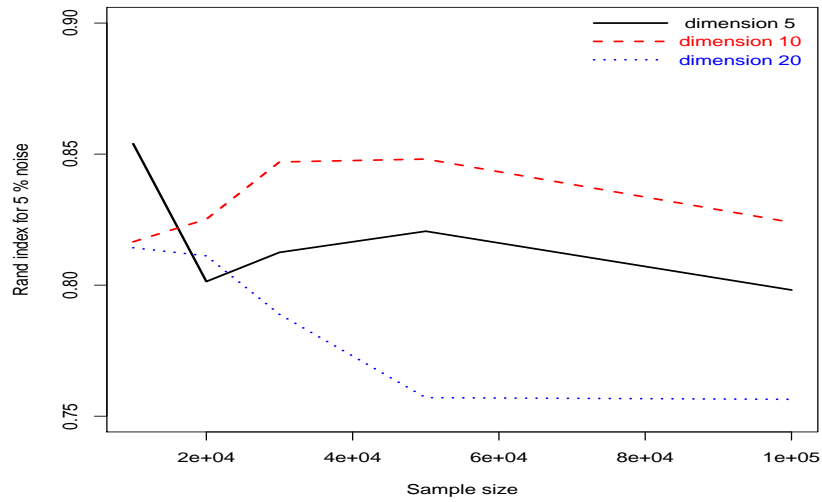

Figure S5: Rand Index plot for different sample sizes varied over dimension for noise level 5%.

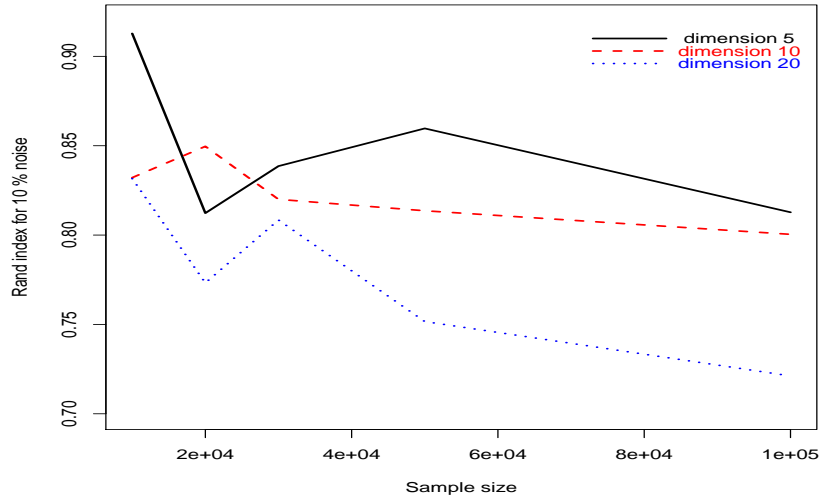

Figure S6: Rand Index plot for different sample sizes varied over dimension for noise level 10%.

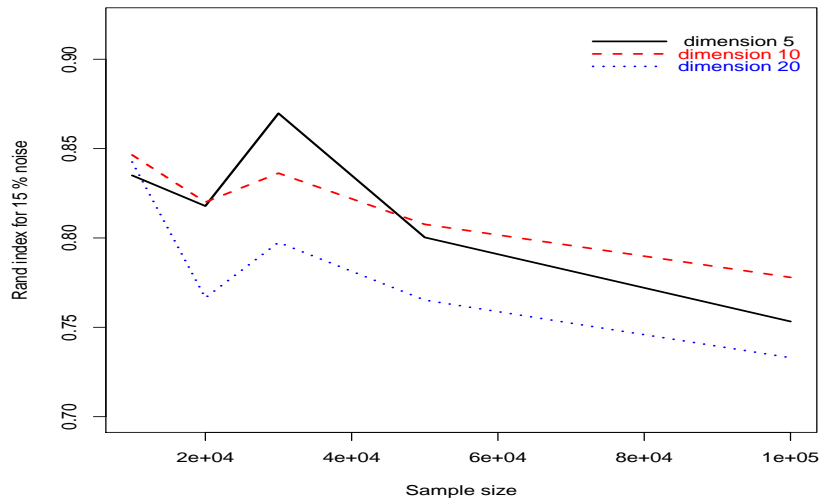

Figure S7: Rand Index plot for different sample sizes varied over dimension for noise level 15%.

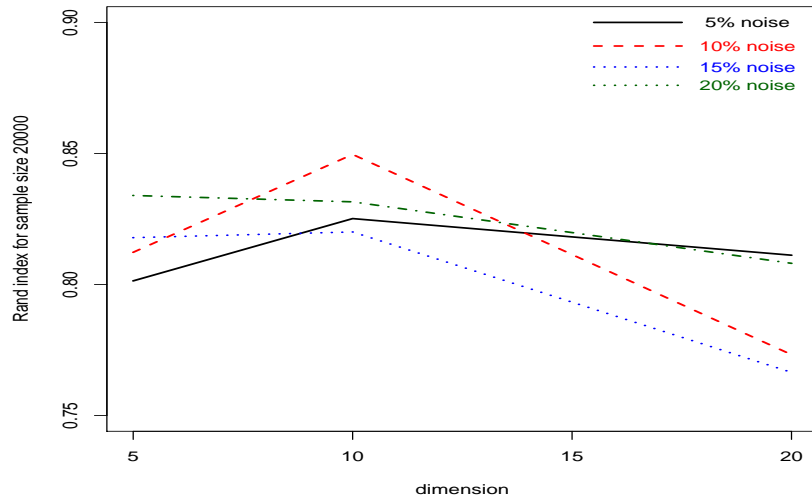

Figure S8: Rand Index plot for different dimensions varied over noise levels for sample size 20000.

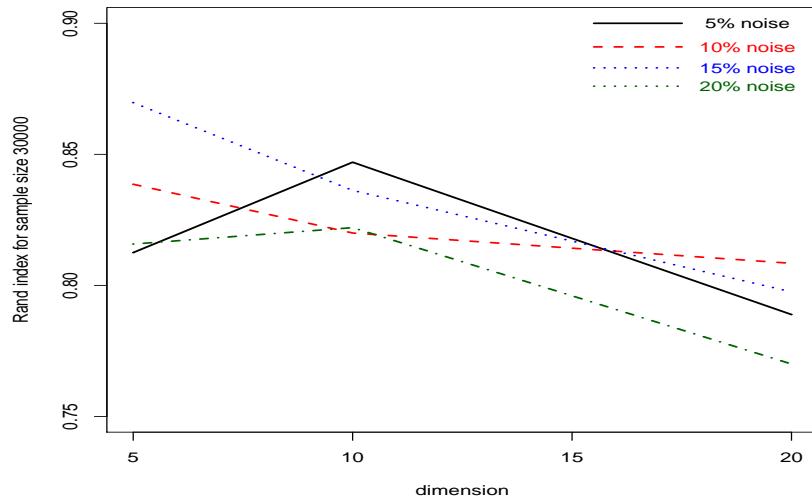

Figure S9: Rand Index plot for different dimensions varied over noise levels for sample size 30000.

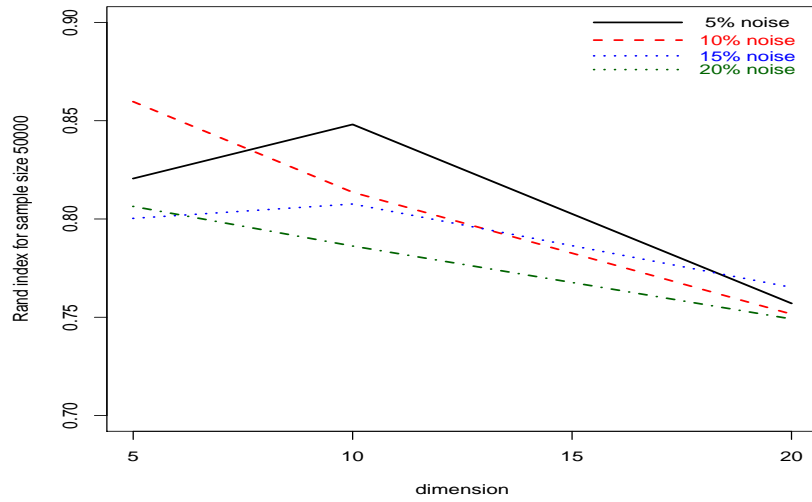

Figure S10: Rand Index plot for different dimensions varied over noise levels for sample size 50000.

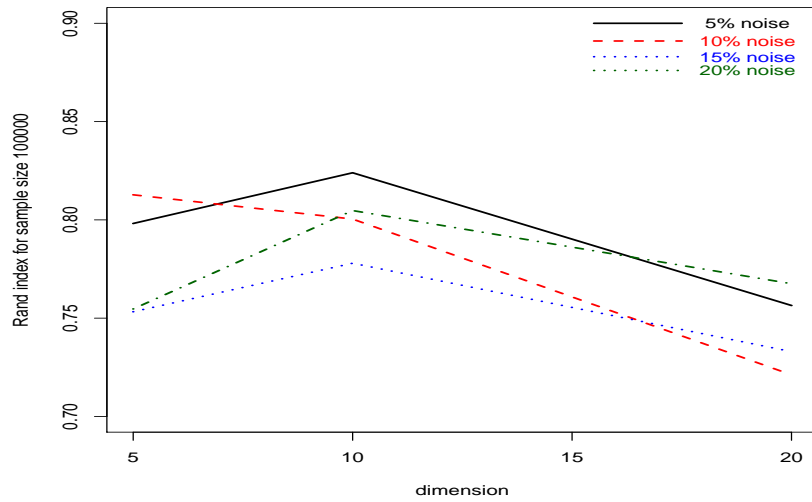

Figure S11: Rand Index plot for different dimensions varied over noise levels for sample size 100000.

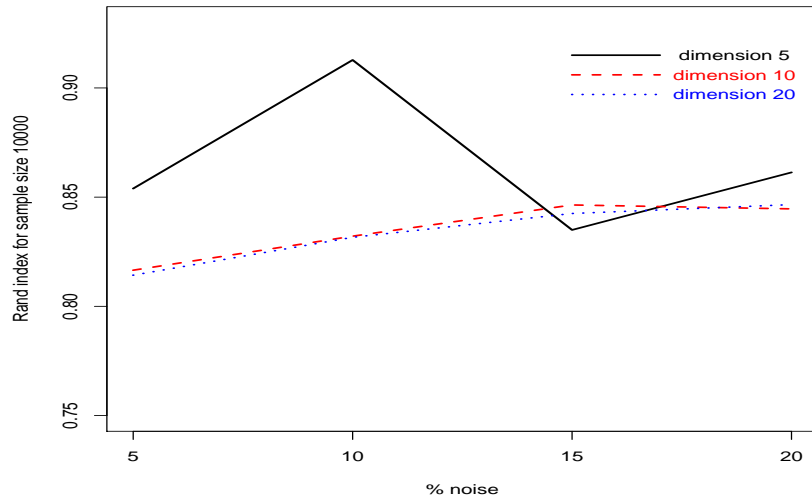

Figure S12: Rand Index plot for different noise levels varied over dimensions for sample size 10000.

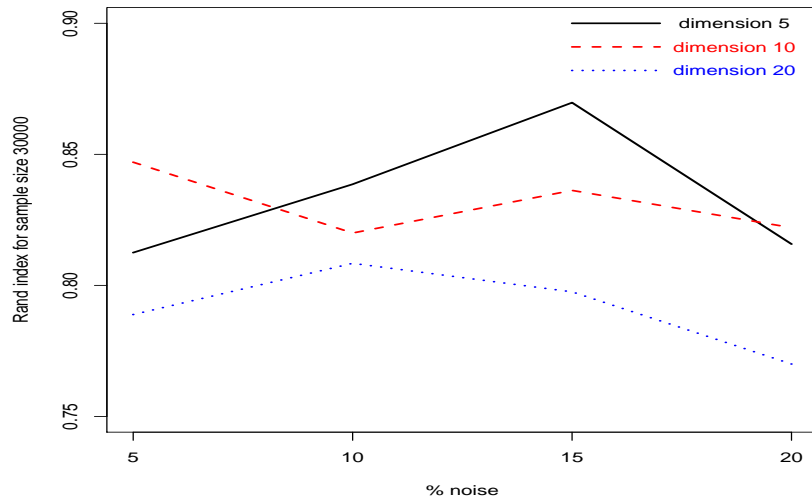

Figure S13: Rand Index plot for different noise levels varied over dimensions for sample size 30000.

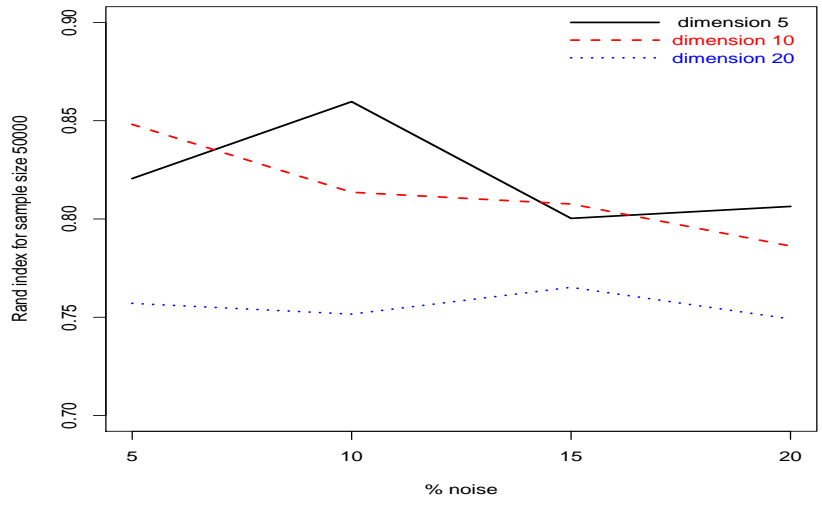

Figure S14: Rand Index plot for different noise levels varied over dimensions for sample size 50000.

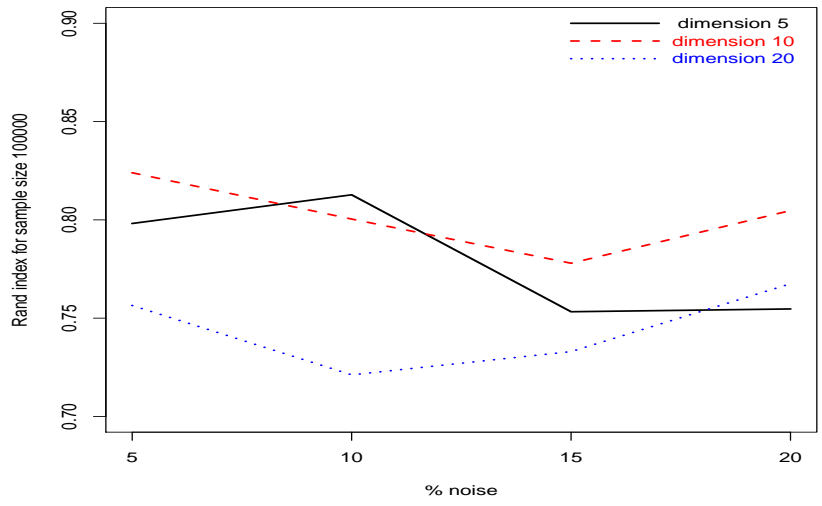

Figure S15: Rand Index plot for different noise levels varied over dimensions for sample size 100000.



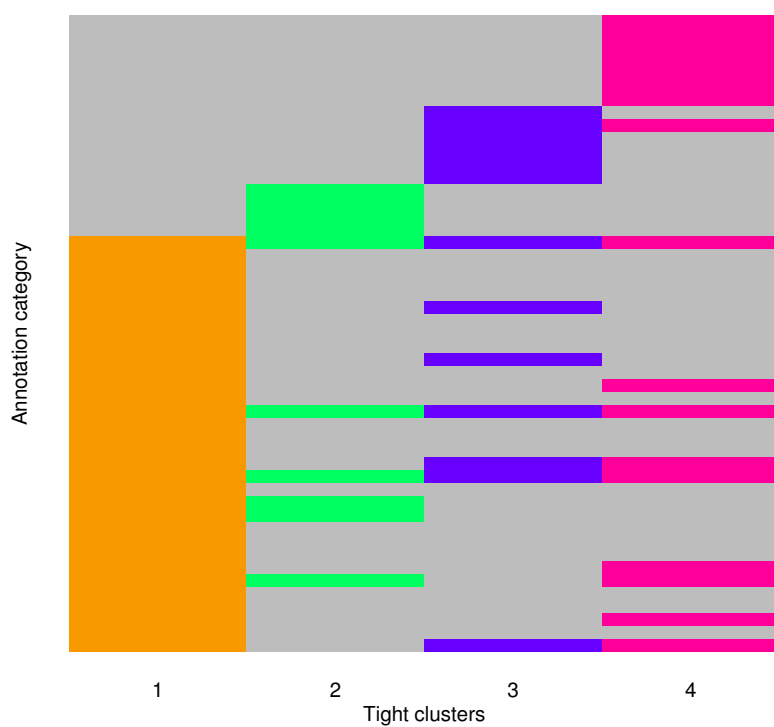

Figure S16: Functional annotations of the clusters detected from tight clustering algorithm (with  $k = 4$ ).

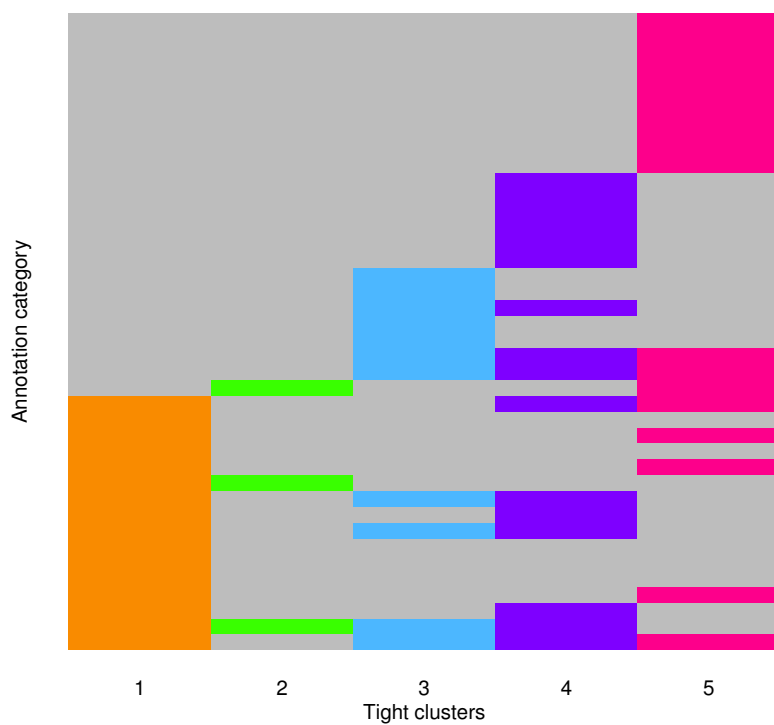

Figure S17: Functional annotations of the clusters detected from tight clustering algorithm (with  $k = 5$ ).
